# Supplementary material
Source: PubMed Central journal article supplement (PMC7076214)
Supplement: supp_RA119.012438_157913_1_supp_465235_q4rtt1.pdf [file supp_RA119.012438_157913_1_supp_465235_q4rtt1.pdf]

# Methionine sulfoxide reductase B from *Corynebacterium diphtheriae* catalyzes sulfoxide reduction via an intramolecular disulfide cascade

Maria-Armineh Tossounian<sup>1,2,3</sup>, Anh-Co Khanh Truong<sup>1,2,3,#</sup>, Lieven Buts<sup>1,3,4</sup>, Khadija Wahni<sup>1,2,3</sup>, Álvaro Mourenza<sup>5</sup>, Martine Leermakers<sup>6</sup>, Didier Vertommen<sup>7</sup>, Luis Mariano Mateos<sup>5</sup>, Alexander N. Volkov<sup>1,3,4,§</sup>, and Joris Messens<sup>1,2,3,\*</sup>

From the <sup>1</sup>VIB-VUB Center for Structural Biology, B-1050 Brussels, Belgium; <sup>2</sup>Brussels Center for Redox Biology, B-1050 Brussels, Belgium; <sup>3</sup>Structural Biology Brussels, Vrije Universiteit Brussel, B-1050 Brussels, Belgium; <sup>4</sup>Jean Jeener NMR Centre, Structural Biology Brussels, Vrije Universiteit Brussel, B-1050 Brussel, Belgium; <sup>5</sup>Department of Molecular Biology, Area of Microbiology, University of León, 24071 León, Spain; <sup>6</sup>Analytical, Environmental & Geo-Chemistry (AMGC), Vrije Universiteit Brussels, Belgium; <sup>7</sup>de Duve Institute, Université Catholique de Louvain, 1200 Brussels, Belgium.

Running title: *Thiol-disulfide exchange mechanism of Cd-MsrB*

#Current address: Laboratory of Angiogenesis and Vascular Metabolism, VIB Center for Cancer Biology, VIB, Leuven, B-3000, Belgium, and Laboratory of Angiogenesis and Vascular Metabolism, Department of Oncology, Leuven Cancer Institute, KU Leuven, Leuven, B-3000, Belgium.

§To whom correspondence should be addressed regarding the NMR structural study: Alexander N. Volkov, Jeener NMR Center, Structural Biology Brussels, Vrije Universiteit Brussel, B-1050 Brussel, Belgium, Phone: +32 2 6293553, Fax: +32 2 6291963; E-mail: ovolkov@vub.be

\*To whom correspondence should be addressed: Joris Messens, VIB-VUB Center for Structural Biology, Vlaams Instituut voor Biotechnologie (VIB), Vrije Universiteit Brussel (VUB), B-1050 Brussels, Belgium, Phone: +32 2 6291992, Fax: +32 2 6291963; E-mail: joris.messens@vub.vib.be

**Keywords:** redox mechanism, biochemistry, methionine sulfoxide, enzyme mechanism, NMR solution structure, hydrogen peroxide, *Corynebacterium diphtheriae*, S-mycothioloation, antioxidant system, oxidative stress

Supplementary Table 1

**Table S1.** Structural statistics over the 20 lowest-energy, water-refined NMR structures of the reduced MsrB. <sup>a</sup>Calculated for all residues. <sup>b</sup>Calculated with PROCHECK-NMR.

|                                              |                 |
|----------------------------------------------|-----------------|
| Distance restraints                          |                 |
| Total                                        | 2335            |
| Intra-residue ( $i - j = 0$ )                | 472             |
| Sequential ( $ i - j  = 1$ )                 | 618             |
| Medium range ( $1 <  i - j  < 5$ )           | 414             |
| Long range ( $ i - j  \geq 5$ )              | 825             |
| S-S (Zn cluster)                             | 6               |
| Dihedral angle restraints                    |                 |
| $\varphi$ and $\psi$                         | 165             |
| Restraints violations                        |                 |
| NOE, $> 0.5 \text{ \AA}$                     | 0.0             |
| Dihedral angle, $> 5^\circ$                  | 1.2             |
| RMSD from average, <sup>a</sup> $\text{\AA}$ |                 |
| Backbone                                     | $0.75 \pm 0.11$ |
| Heavy atoms                                  | $1.22 \pm 0.14$ |
| Ramachandran statistics, <sup>b</sup> %      |                 |
| Most favored                                 | 76.7            |
| Allowed                                      | 20.6            |
| Additionally allowed                         | 1.9             |
| Disallowed                                   | 0.8             |

## Supplementary Table 2

**Table S2: Two disulfide bonds are formed upon MetSO reduction.** Free thiol content of Cd-MsrB WT and Cys mutants (C66S, C122S and C127S) in the absence and presence of MetSO was determined using the DTNB assay. \* Indicates that the experiment was performed under denaturing conditions.

| Cd-MsrB | Without MetSO  |                | With MetSO     |                |
|---------|----------------|----------------|----------------|----------------|
|         | Expected value | Obtained value | Expected value | Obtained value |
| WT      | 3.0            | 2.5            | 1.0            | 0.6            |
| C66S*   | 6.0            | 6.1            | 4.0            | 4.1            |
| C122S   | 2.0            | 1.7            | 2.0            | 2.2            |
| C127S   | 2.0            | 2.0            | 0.0            | 0.0            |



Supplementary Figure 2

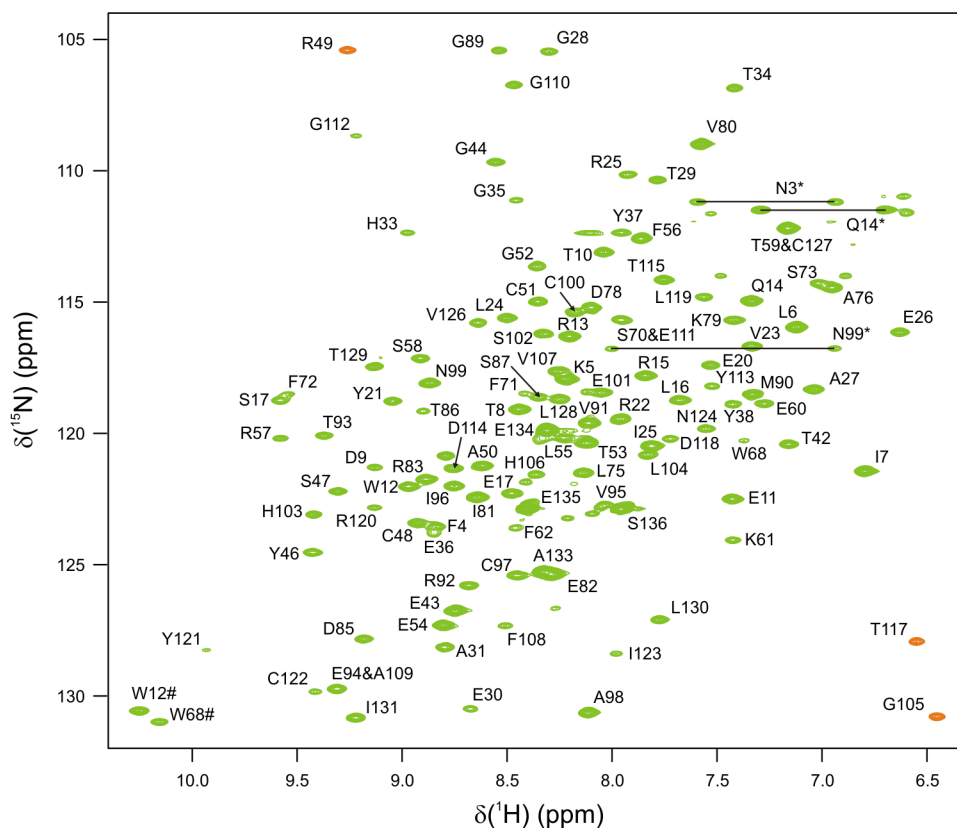

**Figure S2.** The assigned [ $^1\text{H}$ ,  $^{15}\text{N}$ ]-HSQC spectrum of the reduced Cd-MsrB. The labels identify the backbone amides, the side-chain  $\text{NH}_2$  groups of Asn and Gln residues (joined by horizontal lines and indicated by asterisks), and the Trp indole amides (labeled by hash symbols). The backbone amide resonances of Arg49, Gly105, and Thr177 (shown in orange) are aliased in the nitrogen dimension, with their real spectral positions being 133.42, 102.73, and 99.87 ppm, respectively.

Supplementary Figure 3

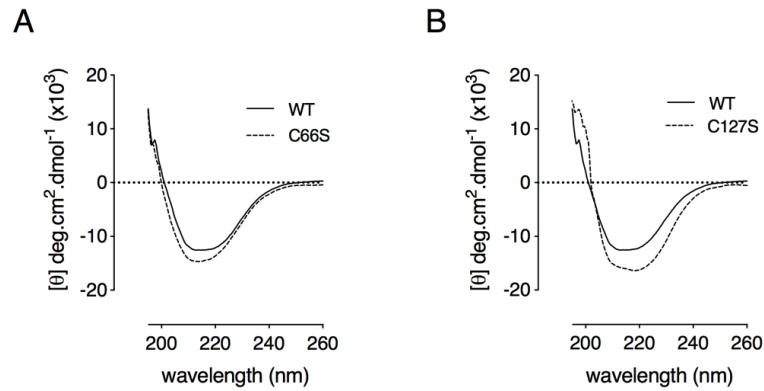

**Figure S3. The C66S and C127S mutants have different overall secondary structures compared to WT Cd-MsrB.** Circular dichroism far-UV spectra show that both (A) the C66S mutant and (B) the C127S mutant show changes in the molar ellipticity  $[\theta]$  at 208 nm and 222 nm, compared to WT. The graphs were generated with Prism8.

Supplementary Figure 4

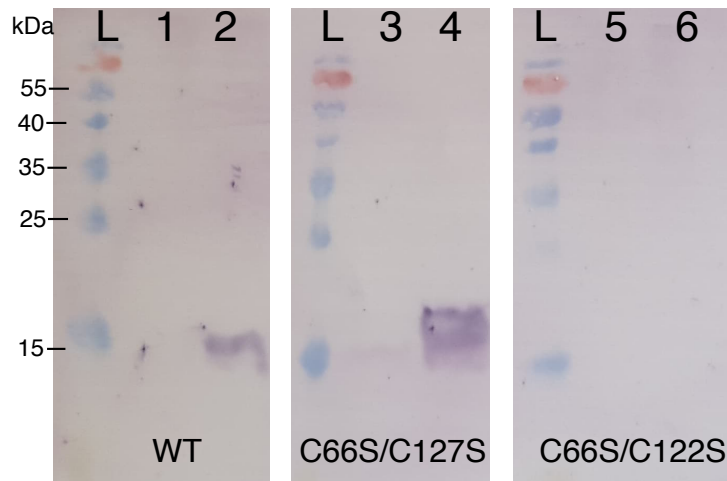

**Figure S4: Sulfenic acid is formed on Cys122 after substrate reduction.** Cysteine *S*-sulfenylation on an anti-dimedone Western blot is shown. WT Cd-MsrB (lane 2) and the C66S/C127S double mutant (lane 4) show sulfenic acid formation in the presence of substrate, while for the C66S/C122S double mutant no band was observed (lane 6). Lane 1, 3 and 5 are the negative controls in the absence of substrate. L is the molecular weight marker.

Supplementary Figure 5

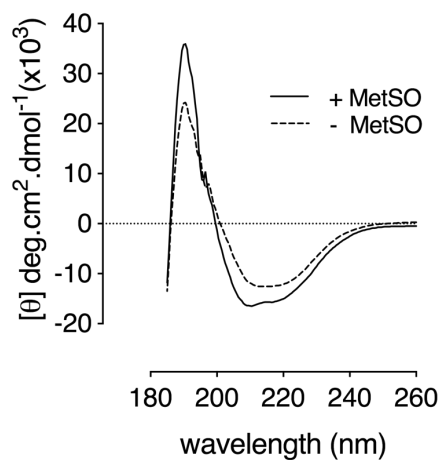

**Figure S5. Overall secondary structural changes upon substrate reduction.** Circular dichroism far-UV spectra of Cd-MsrB reduced (-MetSO) and MetSO-treated (+MetSO) samples are shown. Overall structural changes are observed at 195, 208 and 222 nm. Graph was generated with Prism8.



Supplementary Figure 6

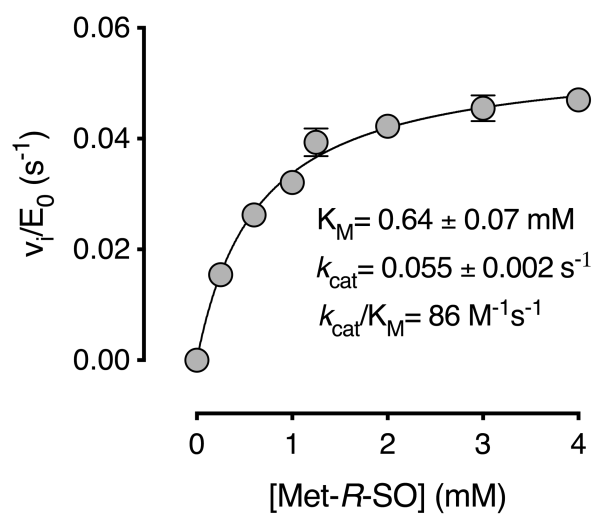

**Figure S6: Kinetic parameters of MetSO reduction by WT Cd-MsrB.** Michaelis-Menten curve of WT Cd-MsrB is shown. Data are presented as a mean  $\pm$  SD of two independent technical repeats and the graphs were generated using Prism8.

Supplementary Figure 7

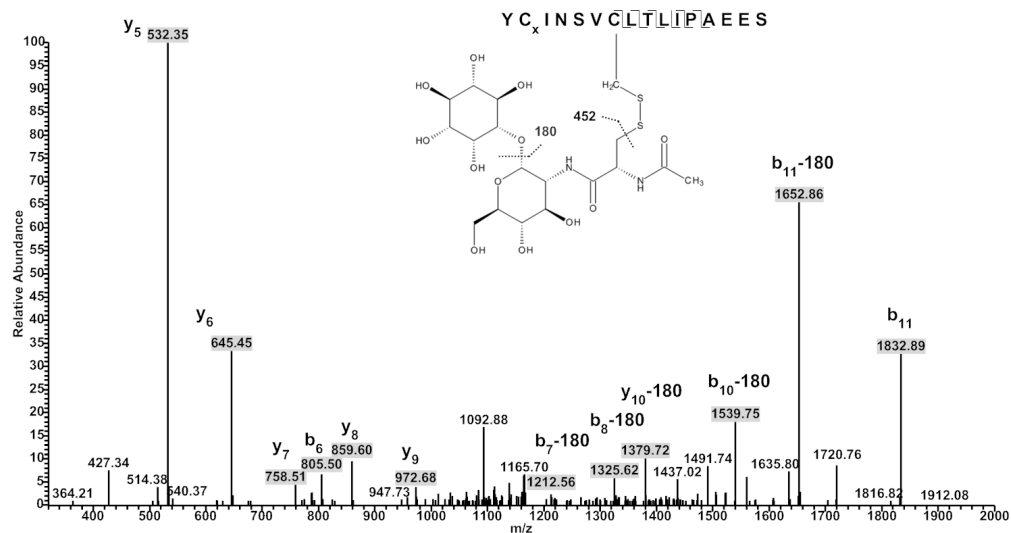

**Figure S7. Cd-MsrB is *S*-mycothiolated on Cys127.** The multistage activation LC-MS<sup>n</sup> spectrum shows MS<sup>2</sup> data obtained from a +2 parent ion with *m/z* 1182.51 combined with MS3 data obtained from a daughter ion of *m/z* 1092.48 resulting from a neutral loss of inositol (180 Da). The *y*- and *b*- series of ions allows exact localization of the mixed disulfide between mycothiol and Cys127. C<sub>x</sub> stands for NEM modified cysteine.

Supplementary Figure 8

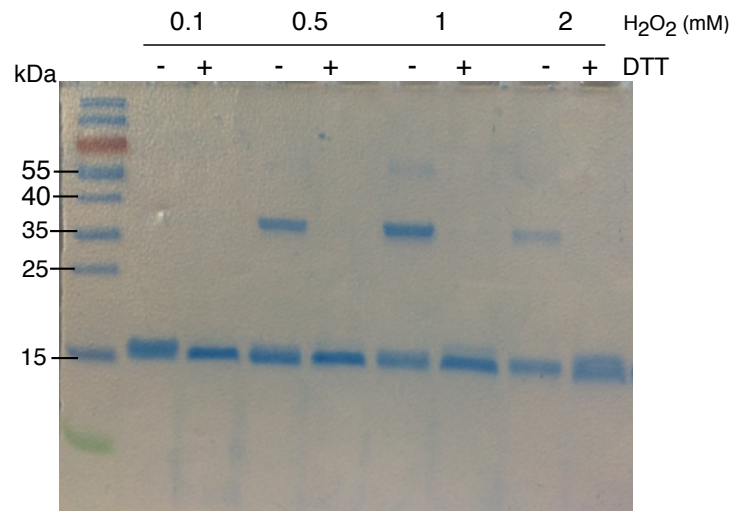

**Figure S8. DTT reduces oxidized Cd-MsrB.** The SDS-PAGE gel shows Cd-MsrB treatment with increasing H<sub>2</sub>O<sub>2</sub> concentrations (0.1 mM, 0.5 mM, 1 mM, and 2 mM). After oxidation, Cd-MsrB migrates as monomeric oxidized (17 kDa), dimeric (34 kDa) and oligomeric (51 kDa) forms. In the presence of DTT, the oxidized bands shift to the reduced monomeric band.
